# Supplementary material for: A Highly Sensitive, Reliable, and High‐Temperature‐Resistant Flexible Pressure Sensor Based on Ceramic Nanofibers
Source: PubMed Central journal article supplement (PMC7507114; doi:10.1002/advs.202000258), 2020-07-27
Supplement: ADVS-7-2000258-s001.pdf [file ADVS-7-2000258-s001.pdf]

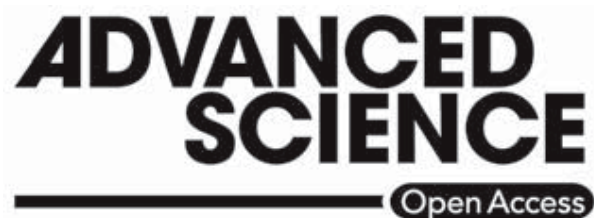

## Supporting Information

for *Adv. Sci.*, DOI: 10.1002/adv.202000258

### A Highly Sensitive, Reliable, and High-Temperature-Resistant Flexible Pressure Sensor Based on Ceramic Nanofibers

*Min Fu, Jianming Zhang, Yuming Jin, Yue Zhao, Siya Huang,\* and Chuan Fei Guo\**

## 1. Mathematical Derivations for the Mechanical-to-Capacitive Sensitivity

In our case, the pressure-to-capacitive sensing model can be derived from the compression behavior of fibrous assemblies.<sup>[1]</sup> The relationship describing the compression behavior of the fibrous mass is

$$P = \lambda \left( \frac{1}{v^3} - \frac{1}{v_0^3} \right), \quad [1]$$

where  $v$  is the volume of the assembly, and  $v_0$  is the value of  $v$  when  $P = 0$ .  $\lambda = KEv_f^3$  is a constant of proportionality with  $K$  represents fiber spatial distribution and characteristics.  $E$  is elastic modulus, and  $v_f$  is the volume of fibers. Since the relationship between the fiber volume fraction and volume of fibers is  $V_f = v_f/v$ , the relationship can be expressed as

$$P = KE(V_f^3 - V_{f0}^3)$$

where  $V_{f0}$  is the fiber volume fraction when  $P = 0$ .

By substituting  $V_f$  with the thickness of the fibrous dielectric layer ( $t$ ) using  $V_f = V_{f0} \cdot t_0/t$ , the equation can be described as:

$$P = KEV_{f0}^3 \left[ \left( \frac{t_0}{t} \right)^3 - 1 \right]$$

where  $t_0$  is the thickness of the fibrous dielectric layer when  $P = 0$ .

In this work, the pressure sensor is designed as a parallel plate capacitor with a composite dielectric layer consisting of nanofibers and air. Thus, the total capacitance  $C$  can be depicted as

$$C = (\varepsilon_{\text{air}}V_{\text{air}} + \varepsilon_fV_f)\omega(A/t)$$

where  $V_{\text{air}}$  and  $V_f$  refer to the volume fraction of the air and nanofibers in the composite dielectric layer,  $\varepsilon_{\text{air}}$  ( $\varepsilon_{\text{air}} \approx 1$ ) and  $\varepsilon_f$  are the dielectric constant of air and nanofibers, respectively,

$\epsilon_0$  is the permittivity of space,  $A$  is the overlapping area of the parallel electrodes. Given  $V_{\text{air}} = 1 - V_f$ , the capacitance of the sensor can be derived as:

$$C = \frac{\epsilon_0 A}{t_0} \left[ \left( \frac{P}{KEV_{f0}^3} + 1 \right)^{\frac{1}{3}} + V_{f0} (\epsilon_f - 1) \left( \frac{P}{KEV_{f0}^3} + 1 \right)^{\frac{2}{3}} \right]$$

Thus, the capacitance is proportional to the dielectric constant of nanofibers, and the initial volume fraction of the nanofibers also has a great influence on the device sensitivity, i.e., nanofibrous networks with a large dielectric constant and a small initial fiber volume fraction would result in a high pressure sensitivity. TiO<sub>2</sub> has a dielectric constant ten times larger than PVDF and PVA. Besides, owing to the calcination process with concurrent large shrinkage of the precursor Ti(OBu)<sub>4</sub>/PVP nanofibers, the resultant TiO<sub>2</sub> nanofibers are of a much smaller diameter (~120 nm), which leads to nanofibrous networks with a much higher porosity (i.e., low  $V_{f0}$ ) than that of PVDF (~360 nm) and PVA (~220 nm) nanofibrous networks. Therefore, the TiO<sub>2</sub> nanofibrous sensor shows better performance in pressure sensitivity than the PVDF and PVA counterparts of the same film thickness.

## 2. Supplementary Figures and Tables

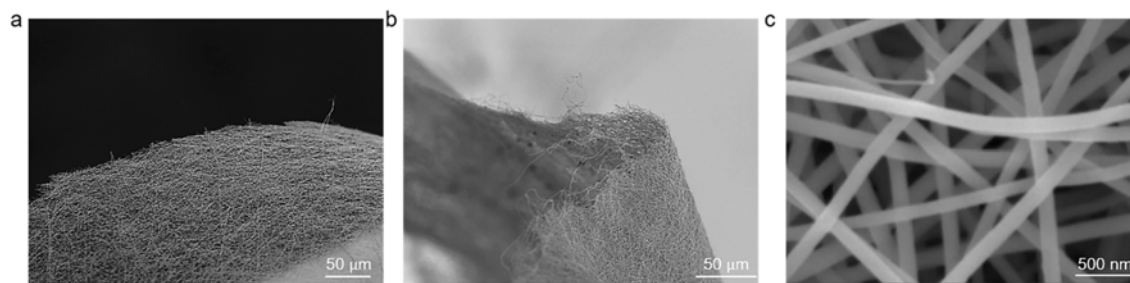

**Figure S1.** SEM images of ultrathin TiO<sub>2</sub> nanofibrous networks at different magnifications.

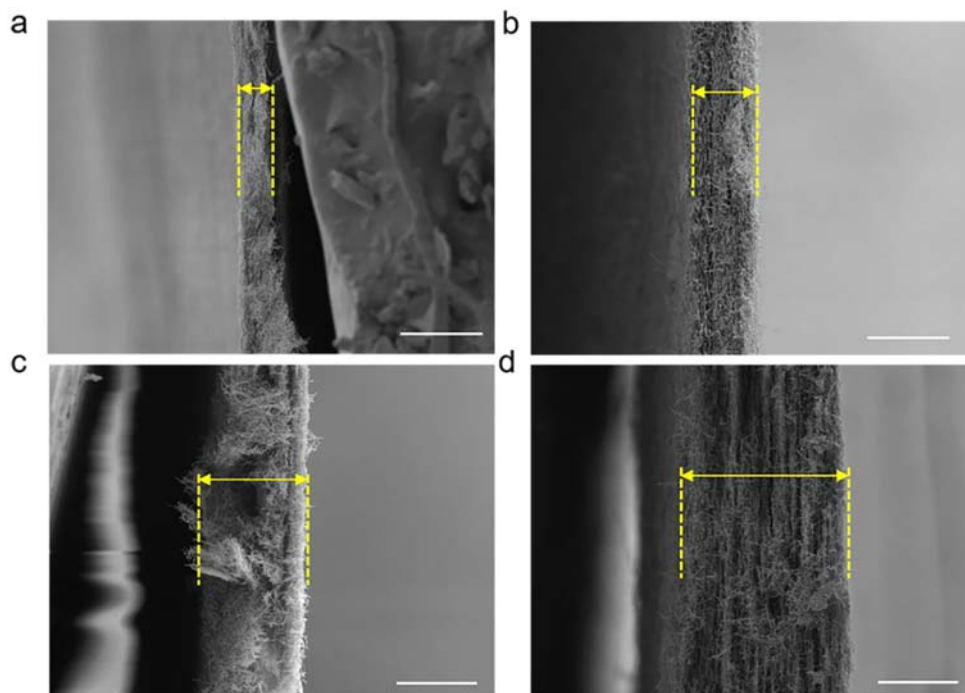

**Figure S2.** SEM images of the sectional view of TiO<sub>2</sub> nanofibrous networks by electrospinning for a) 10 min, b) 15 min, c) 20 min, and d) 30 min. Scale bars, 50  $\mu$ m.

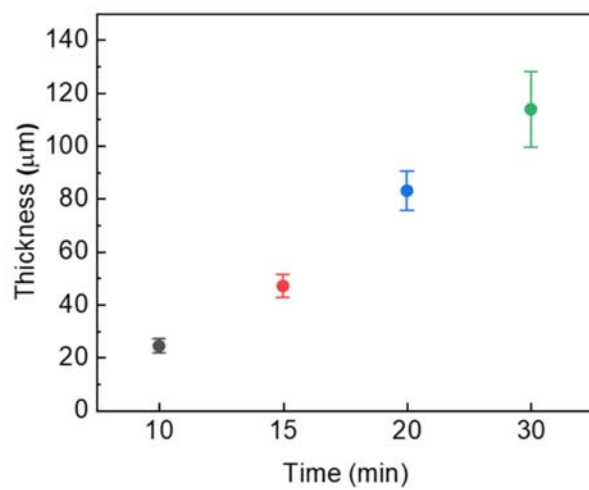

**Figure S3.** Thickness range of TiO<sub>2</sub> nanofibrous networks by electrospinning for 10, 15, 20, and 30 min.

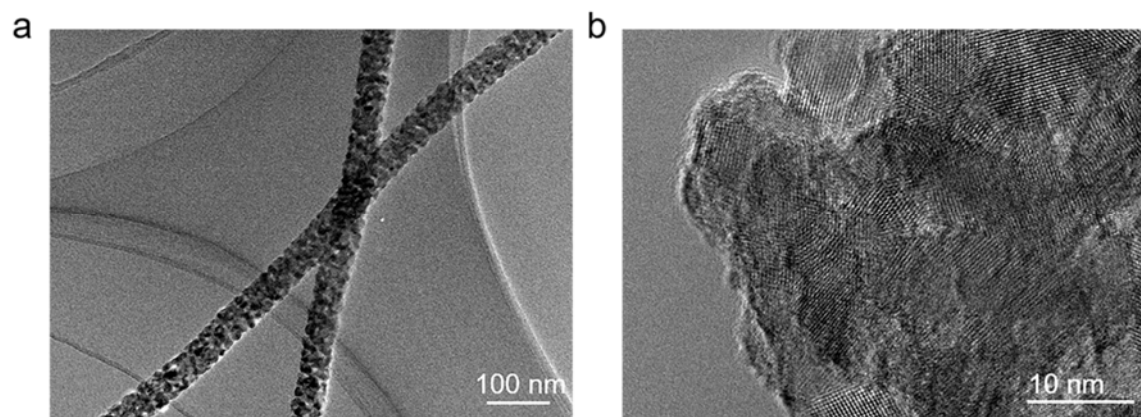

**Figure S4.** High-resolution TEM images of the TiO<sub>2</sub> nanofiber.

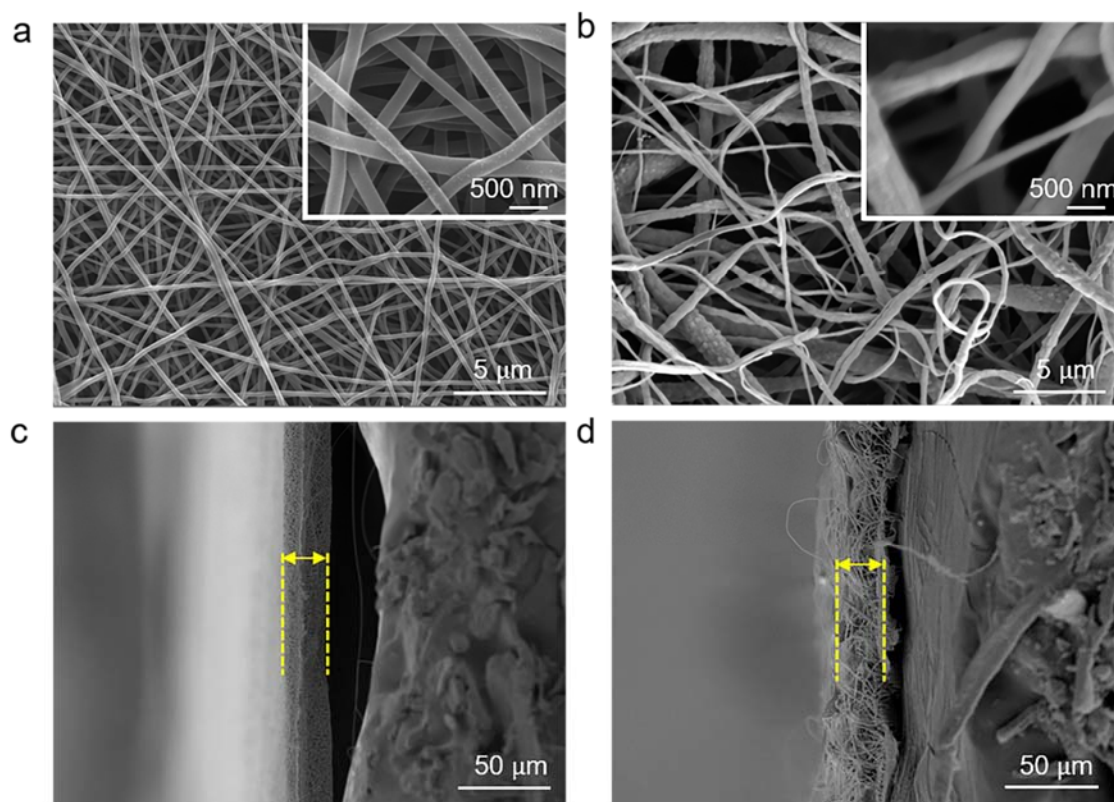

**Figure S5.** SEM images of a) PVA and b) PVDF nanofibrous networks. The corresponding cross-sectional SEM view of c) PVA and d) PVDF nanofibrous networks.



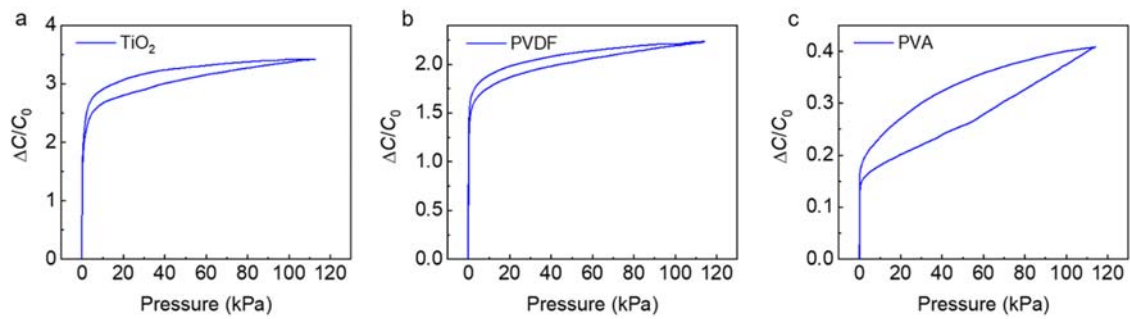

**Figure S6.** Pressure sensitivity of a) TiO<sub>2</sub>, b) PVDF, and c) PVA nanofibrous sensors with the film thickness of 25  $\mu\text{m}$ .

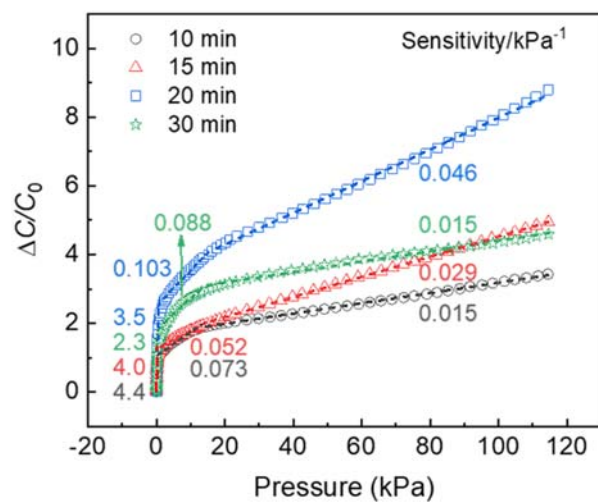

**Figure S7.** Pressure sensitivity of sensors with TiO<sub>2</sub> nanofibrous networks by electrospinning for 10, 15, 20, and 30 min.

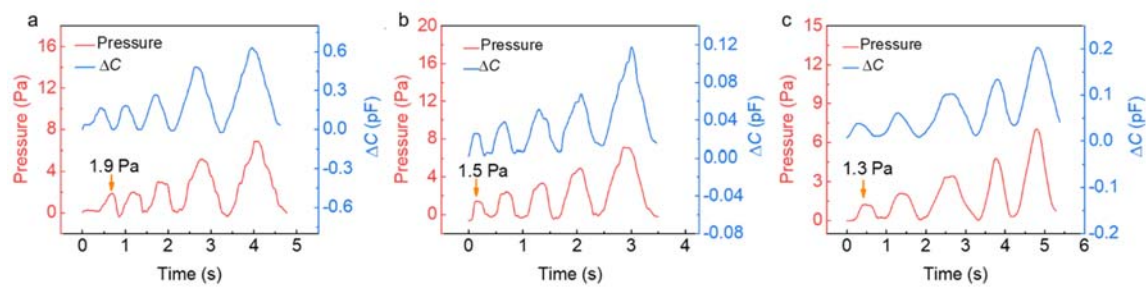

**Figure S8.** Detection limit of sensors with TiO<sub>2</sub> nanofibrous networks by electrospinning for a) 15 min, b) 20 min, and c) 30 min.

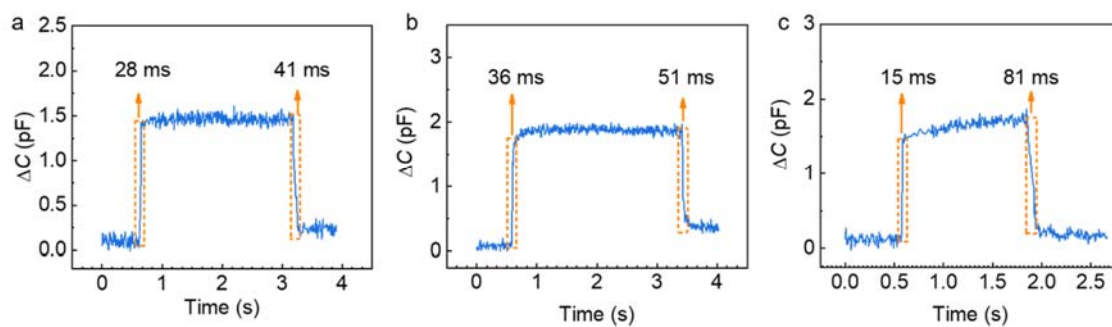

**Figure S9.** Response/relaxation time of sensors with  $\text{TiO}_2$  nanofibrous networks by electrospinning for a) 15 min, b) 20 min, and c) 30 min.

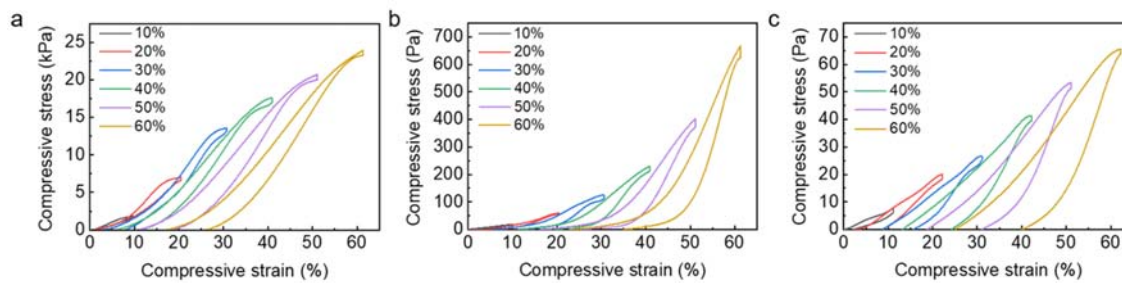

**Figure S10.** The stress-strain curves of a) TiO<sub>2</sub>, b) PVDF, and c) PVA nanofibrous networks at strains of 10%, 20%, 30%, 40%, 50%, and 60%.

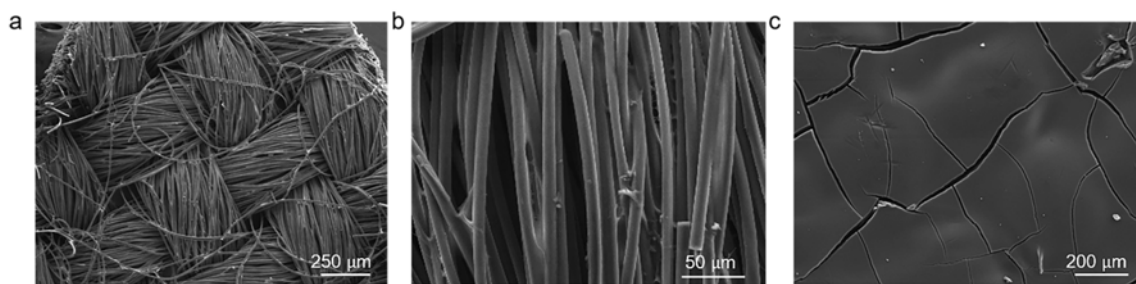

**Figure S11.** SEM images of a, b) front and c) back of the hydrophobic carbon fiber cloth.

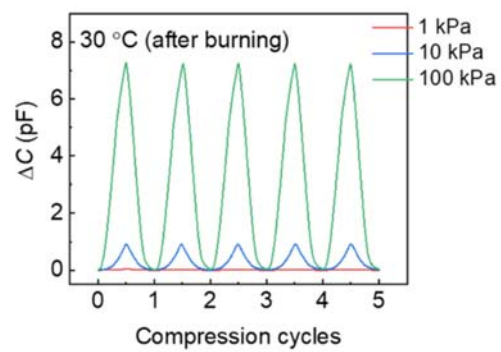

**Figure S12.** Multi-cycle compression tests of the capacitance change with different peak pressures at 30 °C after burning in the butane flame.

**Table S1.**  $C_0$  and  $C_p$  at the pressure of 1 kPa for different compressive cycles.

| Number of cycles | $C_0/pF$ | $C_p/pF$ |
|------------------|----------|----------|
| 1                | 10.566   | 31.855   |
| 10000            | 16.879   | 33.726   |
| 30000            | 16.9     | 34.295   |
| 40000            | 18.256   | 34.298   |
| 50000            | 18.489   | 34.593   |



**Table S2.** The performance comparison between this work and previous studies on breathable pressure sensors.

| Breathability                                | Sensitivity                            | Limit of detection | Response speed (ms) | Working temperature (□) | Cyclic stability (cycles) | Ref.      |
|----------------------------------------------|----------------------------------------|--------------------|---------------------|-------------------------|---------------------------|-----------|
| 0.173 s mL <sup>-1</sup>                     | 4.2 kPa <sup>-1</sup>                  | 1.6 Pa             | <26                 | RT                      | 7 000                     | [2]       |
| -                                            | 14.4 kPa <sup>-1</sup>                 | 2.0 Pa             | 24                  | RT                      | 1 000                     | [3]       |
| -                                            | <10 <sup>-3</sup> kPa <sup>-1</sup>    | tens of kPa        | 500                 | RT                      | 250 000                   | [4]       |
| 6.16 mm s <sup>-1</sup>                      | 0.385 kPa <sup>-1</sup>                | 2 600 Pa           | -                   | RT                      | 10 000                    | [5]       |
| -                                            | 5.65×10 <sup>6</sup> kPa <sup>-1</sup> | 0.76 Pa            | 6                   | RT                      | 1 000                     | [6]       |
| 3×10 <sup>8</sup> mL m <sup>2</sup> for 24 h | 474.8 (gauge factor)                   | -                  | 33                  | RT                      | 5 000                     | [7]       |
| 50.1 mm s <sup>-1</sup>                      | -                                      | 0.06 N             | -                   | RT                      | 10 000                    | [8]       |
| -                                            | 0.31 kPa <sup>-1</sup>                 | 200 Pa             | 20                  | RT                      | 10 000                    | [9]       |
| -                                            | 0.49 kPa <sup>-1</sup>                 | 20 Pa              | 30                  | RT                      | 600                       | [10]      |
| 2×10 <sup>4</sup> mL m <sup>2</sup> for 24 h | 4.4 kPa <sup>-1</sup>                  | 0.8 Pa             | 16                  | RT-370                  | >50 000                   | This work |

**Reference**

- [1] J. Hu, *Structure and Mechanics of Woven Fabrics*, CRC Press, Cambridge, Massachusetts, USA **2004**.
- [2] W. Yang, N.-W. Li, S. Zhao, Z. Yuan, J. Wang, X. Du, B. Wang, R. Cao, X. Li, W. Xu, Z. L. Wang, C. Li, *Adv. Mater. Technol.* **2018**, *3*, 1700241.
- [3] M. Liu, X. Pu, C. Jiang, T. Liu, X. Huang, L. Chen, C. Du, J. Sun, W. Hu, Z. L. Wang, *Adv. Mater.* **2017**, *29*, 1703700.
- [4] S. Honda, Q. Zhu, S. Satoh, T. Arie, S. Akita, K. Takei, *Adv. Funct. Mater.* **2019**, *29*, 1807957.
- [5] R. Cao, J. Wang, S. Zhao, W. Yang, Z. Yuan, Y. Yin, X. Du, N.-W. Li, X. Zhang, X. Li, Z. L. Wang, C. Li, *Nano Res.* **2018**, *11*, 3771.
- [6] Z. Zhou, Y. Li, J. Cheng, S. Chen, R. Hu, X. Yan, X. Liao, C. Xu, J. Yu, L. Li, *J. Mater. Chem. C* **2018**, *6*, 13120.
- [7] Z. Song, W. Li, Y. Bao, F. Han, L. Gao, J. Xu, Y. Ma, D. Han, L. Niu, *ACS Appl. Mater. Interfaces* **2018**, *10*, 42826.
- [8] H. Li, W. Zhang, Q. Ding, X. Jin, Q. Ke, Z. Li, D. Wang, C. Huang, *ACS Appl. Mater. Interfaces* **2019**, *11*, 38023.
- [9] K. Kim, M. Jung, S. Jeon, J. Bae, *Smart Mater. Struct.* **2019**, *28*, 065019.
- [10] Z. Wang, Y. Si, C. Zhao, D. Yu, W. Wang, G. Sun, *ACS Appl. Mater. Interfaces* **2019**, *11*, 27200.
